# Supplementary material
Source: Springer Nature journal article supplement (https://www.springermedizin.de/resource/supplementary/12936_2012_2491_MOESM19_ESM.docx/9542830)
Supplement: MOESM19 [file 9542830]

**Table 1: *In-vitro* blood stage antiplasmodial activities, resistance and selectivity indices of peptides against different strains of *P. falciparum***

| **Peptides** | **Peptide Sequence and design** | **IC50*P. falciparum* (μM)** | | | **Resistance index** | **HC50 URBC**  **μM** |
| --- | --- | --- | --- | --- | --- | --- |
| **3D7** | **Dd2** | **INDO** | **IC50Dd2/**  **IC50 3D7** |
| **Fm** |  | **>100** | **>100** |  | **-** | **>100** |
| **∆Fd** |  | **1.39 ± 0.1** | **1.6 ± 0.09** | **1.5 ± 0.075** | **1.15** | **>50**  **( >35)*** |
| **D-Lys-∆Fd**** |  | **1.8 ± 0.07** | **-** | **-** | **-** | **>50**  **(> 27)** |
| **Fd** |  | **1.5 ± 0.08** | **-** | **-** | **-** | **>50**  **(>33)** |
| **(∆Fm)2** |  | **2.4 ± 0.15** | **2.5**  **± 0.13** | **-** | **1.04** | **>50**  **(>20)** |
| **∆Fq** |  | **0.25 ±0.02** | **-** | **-** | **-** | **2.5**  **±0.13**  **(10)** |
| **Prochitinase** | **EEPHKAASAEGKK** | **> 40** | **-** | **-** | **-** | **> 40** |
| **E30** | **NPPDHSAPLGATRPSAPPLPHVVDLPQLGP** | **> 40** | **-** | **-** | **-** | **> 40** |
| **Insulin** |  | **> 40** | **-** | **-** | **-** | **> 40** |
| **Artemisinin** | | **0.015** | **0.016** | **0.015** | **1** |  |
| **Chloroquine** | | **0.04** | **0.16** | **0.5** | **4** |  |

*** Hemolytic Selectivity index (HC50URBC/ IC50*Pf*3D7) is shown in parenthesis, **: KD refers to Lysine of D configuration. Values of standard deviation given as ± are based on three independent observations.**
